# Supplementary material for: Effect on cardiac function among patients with type 2 diabetes following high-dose mineralocorticoid receptor antagonist using echocardiography; data from the MIRAD randomized clinical trial
Source: Springer Nature journal article supplement (doi:10.1186/s12872-023-03183-1), 2023-03-31
Supplement: MOESM1 [file 12872_2023_3183_MOESM1_ESM.pdf]

Supplementary Figure 1: Flowchart of patient participation in the trial

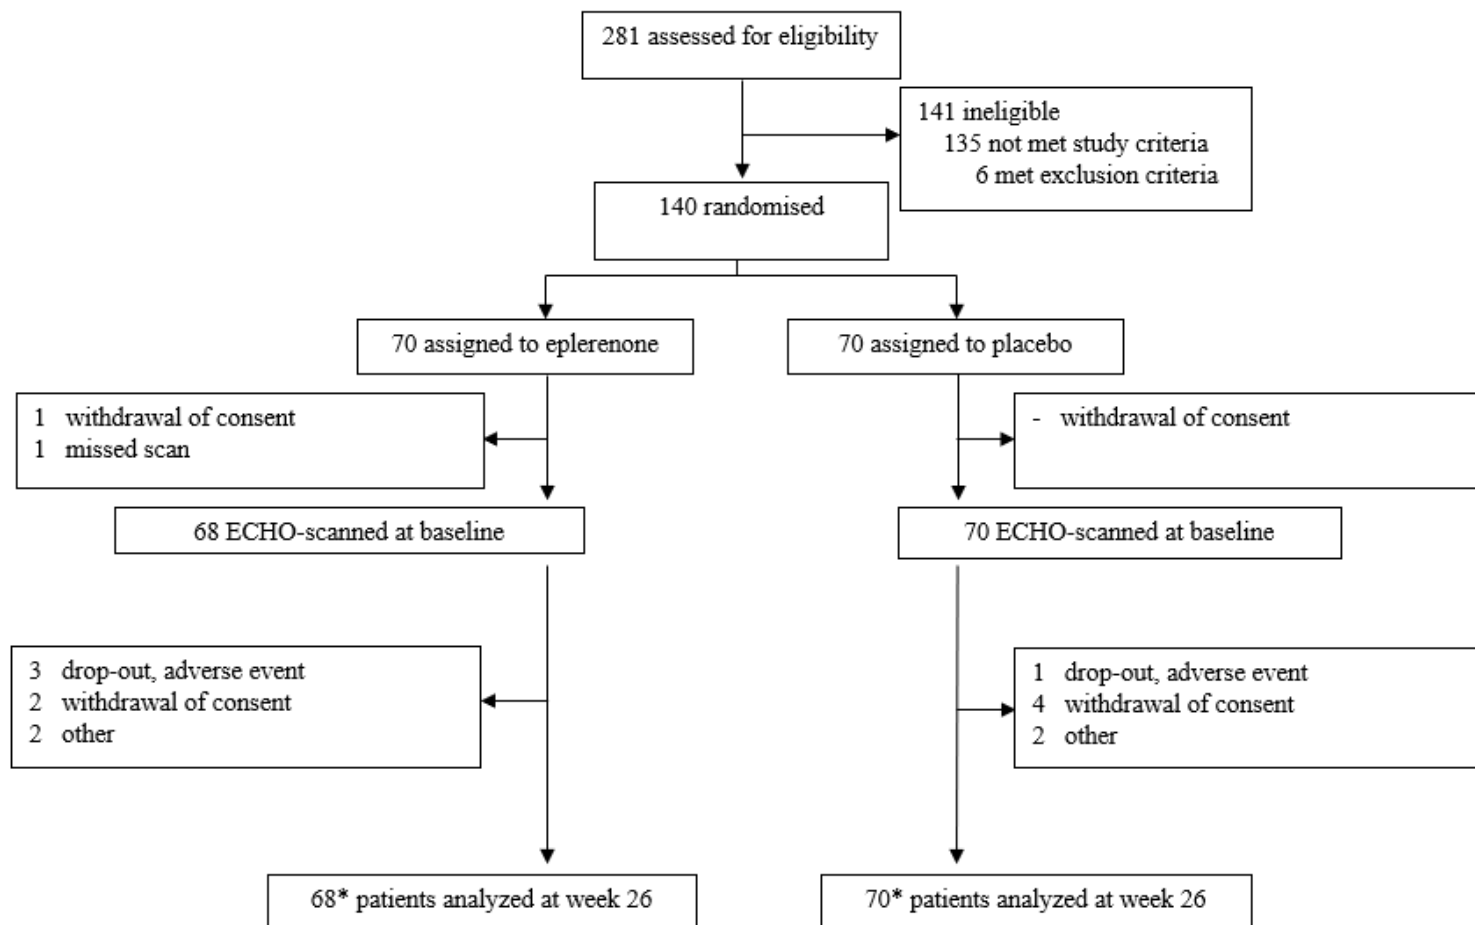

\* All patients completing at least one scan (n = 138) included in an intention to treat analysis as missingness was deemed to be missing at random or missing completely at random.

**Supplementary table 1: Additional echocardiographic measures at baseline**

|                                   | Placebo | Eplerenone |              |
|-----------------------------------|---------|------------|--------------|
| <b>Structure</b>                  |         |            |              |
| IVSD, cm                          | 1.2     | (0.2)      | 1.2 (0.2)    |
| LVID, cm                          | 4.4     | (0.6)      | 4.4 (0.6)    |
| LVPW, cm                          | 1.2     | (0.2)      | 1.2 (0.2)    |
| <b>Left ventricular function</b>  |         |            |              |
| <i>Systolic function</i>          |         |            |              |
| EDV, mL                           | 84.2    | (22.6)     | 90.7 (23.0)  |
| ESV, mL                           | 35.7    | (13.9)     | 37.5 (12.8)  |
| Heart rate, beat/min              | 72.0    | (13.3)     | 69.5 (11.5)  |
| <i>Diastolic function</i>         |         |            |              |
| e', cm/s                          | 6.9     | (1.7)      | 7.4 (1.7)    |
| E-wave, m/s                       | 0.7     | (0.2)      | 0.8 (0.2)    |
| A-wave, m/s                       | 0.8     | (0.2)      | 0.8 (0.2)    |
| E/A-ratio                         | 1.1     | (0.6)      | 1.1 (0.4)    |
| E-wave deceleration time, ms      | 260.9   | (73.9)     | 268.3 (72.1) |
| <b>Right ventricular function</b> |         |            |              |
| GLS, %                            | -16.1   | (5.3)      | -16.6 (5.6)  |
| S', cm/s                          | 12.2    | (3.0)      | 12.0 (2.6)   |
| TAPSE, mm/s                       | 22.6    | (3.8)      | 22.5 (4.8)   |

Additional echocardiographic values measured at baseline. Abbreviations: IVSD, intraventricular septal diameter at end-diastole; LVID, left ventricular internal diameter at end-diastole; LVPW, left ventricular posterior wall diameter at end-diastole; EDV end-diastolic volume; ESV, end-systolic volume; GLS, global longitudinal strain; TAPSE, tricuspid annular plane systolic excursion

Supplementary material – Paper III

|                                   | Baseline |                  | Placebo |               | P     | Eplerenone |               | P     | Treatment effect |                | P     |
|-----------------------------------|----------|------------------|---------|---------------|-------|------------|---------------|-------|------------------|----------------|-------|
| <b>Structure</b>                  |          |                  |         |               |       |            |               |       |                  |                |       |
| IVSD, cm                          | 1.2      | [1.2 to 1.2]     | 0.0     | [0.0 to 0.1]  | 0.370 | 0.0        | [-0.1 to 0.0] | 0.922 | 0.0              | [-0.1 to 0.0]  | 0.445 |
| LVID, cm                          | 4.4      | [4.3 to 4.5]     | 0.0     | [-0.1 to 0.2] | 0.543 | 0.0        | [-0.1 to 0.1] | 0.887 | 0.0              | [-0.2 to 0.1]  | 0.728 |
| LVPW, cm                          | 1.2      | [1.2 to 1.2]     | 0.0     | [-0.1 to 0.0] | 0.586 | 0.0        | [-0.1 to 0.0] | 0.135 | 0.0              | [-0.1 to 0.0]  | 0.461 |
| <b>Systolic function</b>          |          |                  |         |               |       |            |               |       |                  |                |       |
| LV SV, mL                         | 50.8     | [48.6 to 53.1]   | 1.5     | [-1.3 to 4.2] | 0.287 | 0.1        | [-2.7 to 2.8] | 0.971 | -1.4             | [-5.1 to 2.3]  | 0.445 |
| <b>Diastolic function</b>         |          |                  |         |               |       |            |               |       |                  |                |       |
| A', cm/s                          | 9.6      | [9.2 to 10.0]    | -0.3    | [-0.8 to 0.2] | 0.218 | 0.2        | [-0.3 to 0.7] | 0.444 | 0.5              | [-0.2 to 1.1]  | 0.140 |
| S', cm/s                          | 7.1      | [6.9 to 7.4]     | 0.0     | [-0.3 to 0.4] | 0.790 | 0.2        | [-0.1 to 0.5] | 0.188 | 0.2              | [-0.3 to 0.6]  | 0.427 |
| <b>Right ventricular function</b> |          |                  |         |               |       |            |               |       |                  |                |       |
| GLS, %*                           | -16.6    | [-17.6 to -15.6] | 1.4     | [0.0 to 2.8]  | 0.057 | -1.2       | [-2.7 to 0.3] | 0.107 | -2.6             | [-4.5 to -0.7] | 0.009 |
| S', cm/s                          | 12.1     | [11.6 to 12.6]   | -0.1    | [-0.8 to 0.6] | 0.790 | 0.0        | [-0.7 to 0.8] | 0.916 | 0.1              | [-0.8 to 1.1]  | 0.774 |
| TAPSE, mm/s                       | 22.6     | [21.9 to 23.4]   | -0.4    | [-1.6 to 0.8] | 0.482 | 0.3        | [-0.9 to 1.5] | 0.636 | 0.7              | [-0.9 to 2.3]  | 0.378 |

**Supplementary table 2: Analyses of conventional echocardiographic measures of cardiac function**

Treatment effects across additional measures of cardiovascular function measured at baseline and after 26 weeks. The analyses are performed using a constrained linear mixed model. Abbreviations: IVSD, intraventricular septal diameter at end-diastole; LVID, left ventricular internal diameter at end-diastole; LVPW, left ventricular posterior wall at end-diastole; LV SV, left ventricular stroke volume; GLS, global longitudinal strain; TAPSE, tricuspid annular plane systolic excursion.

Supplementary table 3: Complete case analyses of effect of high-dose eplerenone after 26 weeks of treatment

|                                   | Baseline |                  | Placebo |                 | P     | Eplerenone |                | P     | Treatment effect |                | P     |  |
|-----------------------------------|----------|------------------|---------|-----------------|-------|------------|----------------|-------|------------------|----------------|-------|--|
| <i>Structure</i>                  |          |                  |         |                 |       |            |                |       |                  |                |       |  |
| LVMi, g/m <sup>2</sup>            | 92.4     | [88.4 to 96.4]   | 2.0     | [-2.8 to 6.8]   | 0.401 | -1.7       | [-6.6 to 3.1]  | 0.481 | -3.8             | [-10.2 to 2.7] | 0.247 |  |
| IVS, cm                           | 1.2      | [1.2 to 1.3]     | 0.0     | [0.0 to 0.1]    | 0.459 | 0.0        | [-0.1 to 0.0]  | 0.811 | 0.0              | [-0.1 to 0.0]  | 0.444 |  |
| LVID, cm                          | 4.4      | [4.3 to 4.5]     | 0.0     | [-0.1 to 0.2]   | 0.461 | 0.0        | [-0.1 to 0.2]  | 0.784 | 0.0              | [-0.2 to 0.1]  | 0.728 |  |
| LVPW, cm                          | 1.2      | [1.2 to 1.2]     | 0.0     | [-0.1 to 0.0]   | 0.549 | 0.0        | [-0.1 to 0.0]  | 0.124 | 0.0              | [-0.1 to 0.0]  | 0.461 |  |
| <i>Left ventricular function</i>  |          |                  |         |                 |       |            |                |       |                  |                |       |  |
| GLS, %*                           | -15.1    | [-15.7 to -14.5] | 0.5     | [-0.3 to 1.3]   | 0.240 | 0.0        | [-0.7 to 0.8]  | 0.905 | -0.4             | [-1.5 to 0.6]  | 0.427 |  |
| EF, %*                            | 59.0     | [57.7 to 60.4]   | 0.0     | [-1.6 to 1.6]   | 0.972 | 0.9        | [-0.7 to 2.5]  | 0.273 | 0.9              | [-1.1 to 2.8]  | 0.382 |  |
| EDV, mL                           | 87.4     | [83.2 to 91.6]   | 1.9     | [-2.3 to 6.1]   | 0.376 | -2.1       | [-6.3 to 2.1]  | 0.328 | -3.9             | [-9.6 to 1.7]  | 0.167 |  |
| ESV, mL                           | 36.3     | [34.0 to 38.5]   | 0.2     | [-2.1 to 2.6]   | 0.837 | -1.7       | [-4.1 to 0.6]  | 0.145 | -2.0             | [-5.0 to 1.1]  | 0.201 |  |
| SV, mL                            | 51.1     | [48.7 to 53.6]   | 1.4     | [-1.4 to 4.2]   | 0.330 | -0.1       | [-2.8 to 2.7]  | 0.965 | -1.4             | [-5.1 to 2.3]  | 0.445 |  |
| Heart rate, beat/min              | 70.3     | [68.0 to 72.6]   | 1.3     | [-1.1 to 3.7]   | 0.296 | 0.5        | [-2.0 to 3.0]  | 0.671 | -0.7             | [-3.9 to 2.4]  | 0.643 |  |
| <i>Diastolic function</i>         |          |                  |         |                 |       |            |                |       |                  |                |       |  |
| E-wave, m/s                       | 0.8      | [0.7 to 0.8]     | 0.0     | [0.0 to 0.0]    | 0.563 | 0.0        | [0.0 to 0.0]   | 0.897 | 0.0              | [0.0 to 0.1]   | 0.749 |  |
| A-wave, m/s                       | 0.8      | [0.7 to 0.8]     | 0.0     | [0.0 to 0.0]    | 0.484 | 0.0        | [0.0 to 0.1]   | 0.158 | 0.0              | [0.0 to 0.1]   | 0.129 |  |
| E/A-ratio                         | 1.1      | [1.0 to 1.2]     | 0.0     | [-0.1 to 0.1]   | 0.719 | -0.1       | [-0.1 to 0.0]  | 0.152 | -0.1             | [-0.2 to 0.0]  | 0.193 |  |
| e', cm/s                          | 7.1      | [6.8 to 7.4]     | 0.0     | [-0.3 to 0.4]   | 0.893 | 0.1        | [-0.2 to 0.5]  | 0.483 | 0.1              | [-0.4 to 0.6]  | 0.669 |  |
| E/e'-ratio                        | 11.2     | [10.4 to 12.0]   | 0.0     | [-1.6 to 1.6]   | 0.972 | 0.9        | [-0.7 to 2.5]  | 0.273 | 0.0              | [-1.2 to 1.2]  | 0.991 |  |
| E-wave deceleration time          | 266.0    | [252.5 to 279.4] | 1.7     | [-15.1 to 18.5] | 0.844 | 13.3       | [-3.6 to 30.3] | 0.122 | 11.7             | [-9.7 to 33.1] | 0.283 |  |
| A', cm/s                          | 9.6      | [9.2 to 10.0]    | -0.3    | [-0.8 to 0.2]   | 0.198 | 0.2        | [-0.3 to 0.6]  | 0.481 | 0.5              | [-0.2 to 1.1]  | 0.140 |  |
| S', cm/s                          | 7.1      | [6.8 to 7.4]     | 0.0     | [-0.3 to 0.4]   | 0.760 | 0.2        | [-0.1 to 0.5]  | 0.178 | 0.2              | [-0.3 to 0.6]  | 0.427 |  |
| LA volume, mL                     | 53.1     | [49.7 to 56.4]   | -2.1    | [-5.2 to 1.1]   | 0.195 | -4.4       | [-7.6 to -1.3] | 0.006 | -2.3             | [-6.6 to 1.9]  | 0.279 |  |
| <i>Right ventricular function</i> |          |                  |         |                 |       |            |                |       |                  |                |       |  |
| GLS, %*                           | -16.5    | [-17.6 to -15.4] | 1.4     | [0.0 to 2.9]    | 0.048 | -1.1       | [-2.6 to 0.3]  | 0.130 | -2.6             | [-4.5 to -0.7] | 0.008 |  |
| S', cm/s                          | 12.0     | [11.5 to 12.6]   | -0.1    | [-0.8 to 0.6]   | 0.845 | 0.1        | [-0.7 to 0.8]  | 0.861 | 0.1              | [-0.8 to 1.1]  | 0.771 |  |
| TAPSE, mm/s                       | 22.5     | [21.7 to 23.4]   | -0.4    | [-1.6 to 0.8]   | 0.537 | 0.3        | [-0.9 to 1.5]  | 0.583 | 0.7              | [-0.9 to 2.3]  | 0.379 |  |

Complete case analysis regarding effects of treatment on all reported endpoints. The analyses are performed using a constrained linear mixed model. Abbreviations: LVMi, left ventricular mass indexed to body surface area; IVSD, intraventricular septal diameter at end-diastole; LVID, left ventricular internal diameter at end-diastole; LVPW, left ventricular posterior wall diameter at end-diastole; GLS, global longitudinal strain; EF, ejection fraction; EDV, end-diastolic volume; ESV, end-systolic volume; SV, stroke volume; LA, left atrial volume; TAPSE, tricuspid annular plane systolic excursion.

**Supplementary table 4: Testing for effect medication of prescribed medication on diastolic function and left ventricular mass**

|                        | <b>Treatment</b> | <b>Prescribed</b>   | <b>P-value</b> | <b>Not prescribed</b> | <b>P-value</b> | <b>Interaction</b> |
|------------------------|------------------|---------------------|----------------|-----------------------|----------------|--------------------|
| LAI, mL/m <sup>2</sup> | ACE-i            | 1.4 [-2.5 to 5.2]   | 0.485          | -2.0 [-4.4 to 0.3]    | 0.094          | 0.142              |
|                        | ARB              | -2.3 [-5.1 to 0.5]  | 0.111          | 0.1 [-2.8 to 2.9]     | 0.953          | 0.248              |
|                        | Beta-blockade    | -3.1 [-6.4 to 0.2]  | 0.064          | 0.1 [-2.5 to 2.6]     | 0.965          | 0.132              |
| E/e', %                | ACE-i            | 1.0 [-1.3 to 3.2]   | 0.385          | -0.4 [-1.8 to 1.0]    | 0.561          | 0.296              |
|                        | ARB              | 0.1 [-1.6 to 1.8]   | 0.900          | -0.1 [-1.8 to 1.6]    | 0.889          | 0.851              |
|                        | Beta-blockade    | 0.6 [-1.3 to 2.6]   | 0.521          | -0.4 [-1.9 to 1.1]    | 0.620          | 0.418              |
| LVMi, g/m <sup>2</sup> | ACE-i            | -6.0 [-18.1 to 6.2] | 0.332          | -2.9 [-10.6 to 4.8]   | 0.455          | 0.676              |
|                        | ARB              | -5.7 [-14.9 to 3.5] | 0.221          | -1.7 [-10.9 to 7.5]   | 0.713          | 0.541              |
|                        | Beta-blockade    | -1.8 [-12.6 to 9.0] | 0.742          | -4.6 [-12.6 to 3.4]   | 0.254          | 0.677              |

Treatment effects of the primary focus are tested for the presence of effect modification of concurrent therapy prescribed at baseline, first according to the presence or absence and finally a formal test of interaction. The analyses are performed using a modified constrained linear mixed model expanded the primary analysis to include the fixed effects: ‘*time-prescribed interaction*’ and ‘*time-prescribed-treatment interaction*’. Abbreviations: LAi, left atrial volume indexed to body surface area; LVMi, left ventricular mass indexed to body surface area; ACE-i, angiotensin converting enzyme; ARB, angiotensin receptor blocker.
